# Supplementary material for: Predicting deleterious nsSNPs: an analysis of sequence and structural attributes
Source: Springer Nature journal article supplement (doi:10.1186/1471-2105-7-217), 2006-04-21

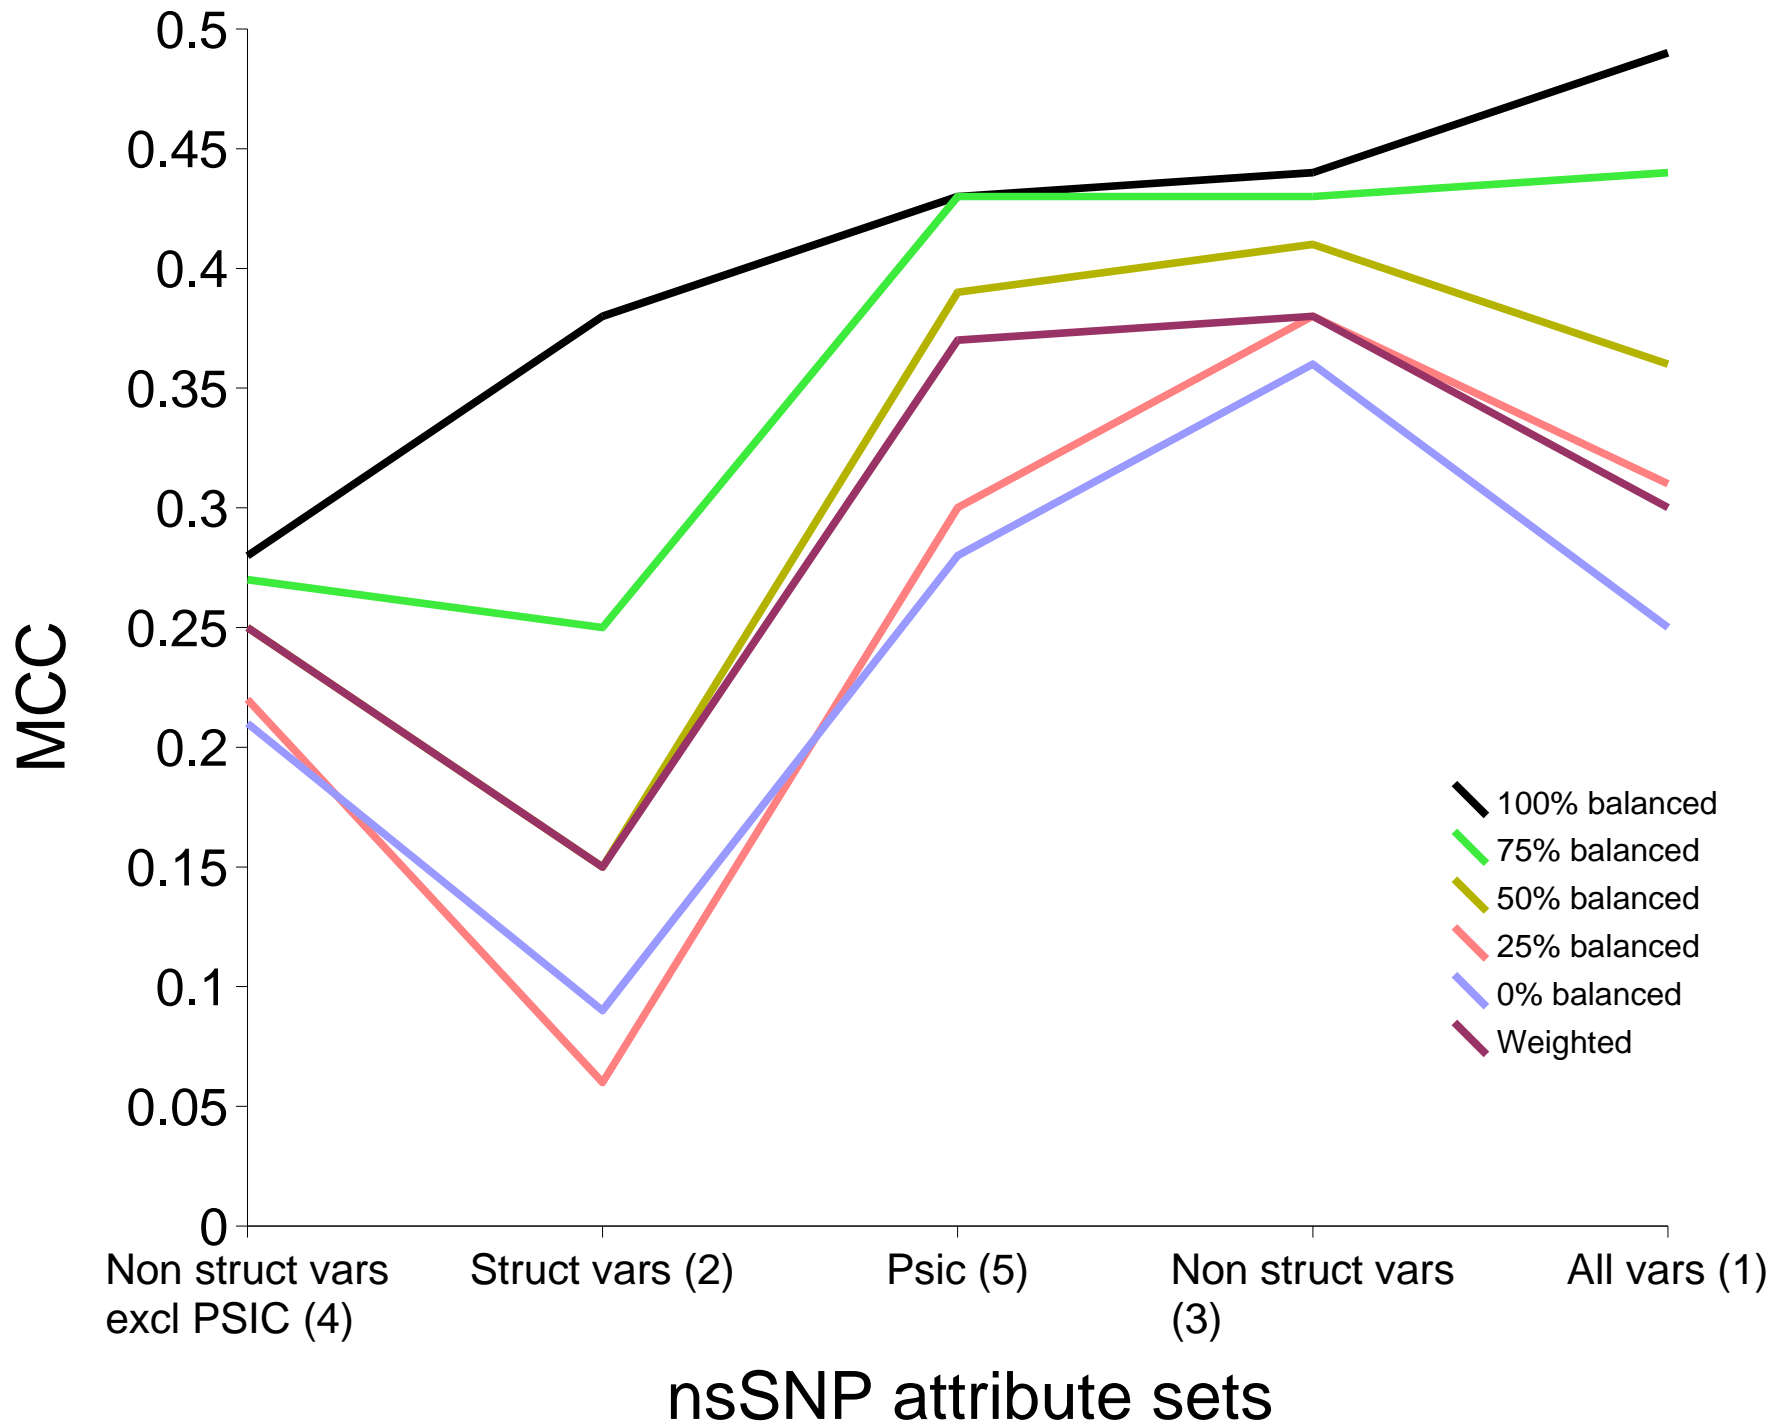

Supplement: 12859_2005_956_MOESM1_ESM.pdf [file 12859_2005_956_MOESM1_ESM.pdf]
